# Supplementary material
Source: Springer Nature journal article supplement (https://www.springermedizin.de/resource/supplementary/12906_2001_8_MOESM3_ESM.pdf/9519316)

### A IL6

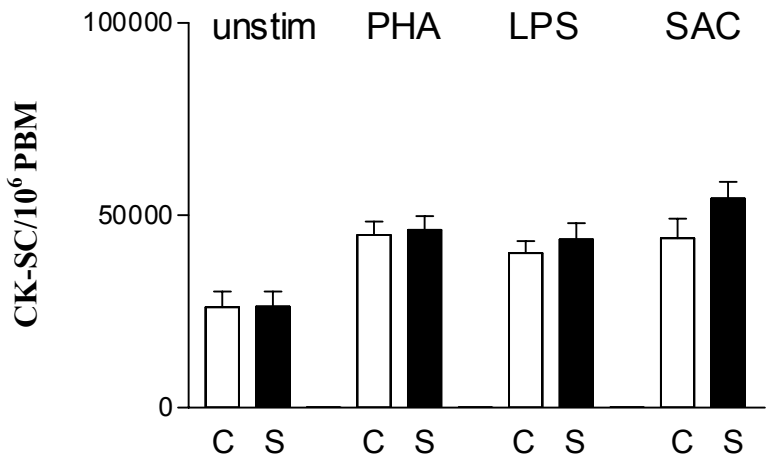

### B TNF $\alpha$

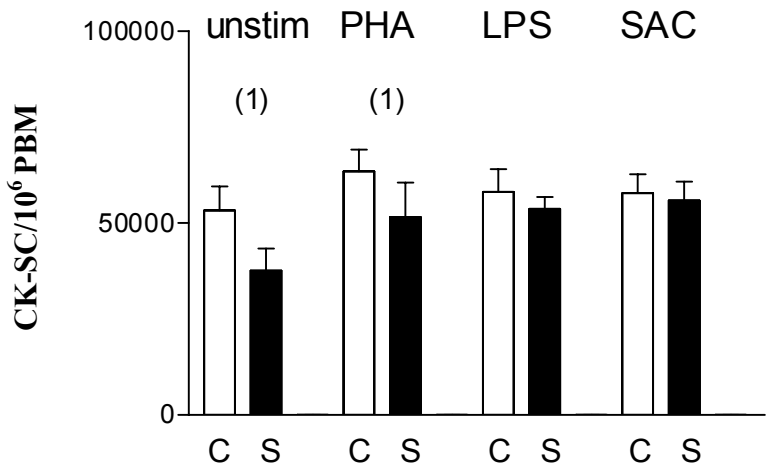

Supplement: MOESM3 [file 9519316]
